# Supplementary material
Source: Atypon-hosted journal article supplement (https://static.yanyin.tech/literature/current_protocol/10.1002/cpz1.1057/attachments/downloadSupplement)
Supplement: downloadSupplement [file downloadSupplement]

## Sheet: Left
Date:				Batch ID:					Study:								Substrate A -							Substrate B -
ID
Position	L	R	L	L	R	R	L	R	R	L	L	R	L	L	R	R	L	R	R	L	L	R	L	L	R	R	L	R	R	L
TRIAL#	1	2	3	4	5	6	7	8	9	10	11	12	13	14	15	16	17	18	19	20	21	22	23	24	25	26	27	28	29	30
Reward	A	B		B		A		A	B	A	B		B		A		A	B	A	B		B		A		A	B	A	B
Latency
ID
Position	L	R	L	L	R	R	L	R	R	L	L	R	L	L	R	R	L	R	R	L	L	R	L	L	R	R	L	R	R	L
TRIAL#	1	2	3	4	5	6	7	8	9	10	11	12	13	14	15	16	17	18	19	20	21	22	23	24	25	26	27	28	29	30
Reward	A	B		B		A		A	B	A	B		B		A		A	B	A	B		B		A		A	B	A	B
Latency
ID
Position	L	R	L	L	R	R	L	R	R	L	L	R	L	L	R	R	L	R	R	L	L	R	L	L	R	R	L	R	R	L
TRIAL#	1	2	3	4	5	6	7	8	9	10	11	12	13	14	15	16	17	18	19	20	21	22	23	24	25	26	27	28	29	30
Reward	A	B		B		A		A	B	A	B		B		A		A	B	A	B		B		A		A	B	A	B
Latency
ID
Position	L	R	L	L	R	R	L	R	R	L	L	R	L	L	R	R	L	R	R	L	L	R	L	L	R	R	L	R	R	L
TRIAL#	1	2	3	4	5	6	7	8	9	10	11	12	13	14	15	16	17	18	19	20	21	22	23	24	25	26	27	28	29	30
Reward	A	B		B		A		A	B	A	B		B		A		A	B	A	B		B		A		A	B	A	B
Latency

## Sheet: Right
Date:				Batch ID:					Study:								Substrate A -							Substrate B -
ID
Position	R	L	R	R	L	L	R	L	L	R	R	L	R	R	L	L	R	L	L	R	R	L	R	R	L	L	R	L	L	R
TRIAL#	1	2	3	4	5	6	7	8	9	10	11	12	13	14	15	16	17	18	19	20	21	22	23	24	25	26	27	28	29	30
Reward	A	B		B		A		A	B	A	B		B		A		A	B	A	B		B		A		A	B	A	B
Latency
ID
Position	R	L	R	R	L	L	R	L	L	R	R	L	R	R	L	L	R	L	L	R	R	L	R	R	L	L	R	L	L	R
TRIAL#	1	2	3	4	5	6	7	8	9	10	11	12	13	14	15	16	17	18	19	20	21	22	23	24	25	26	27	28	29	30
Reward	A	B		B		A		A	B	A	B		B		A		A	B	A	B		B		A		A	B	A	B
Latency
ID
Position	R	L	R	R	L	L	R	L	L	R	R	L	R	R	L	L	R	L	L	R	R	L	R	R	L	L	R	L	L	R
TRIAL#	1	2	3	4	5	6	7	8	9	10	11	12	13	14	15	16	17	18	19	20	21	22	23	24	25	26	27	28	29	30
Reward	A	B		B		A		A	B	A	B		B		A		A	B	A	B		B		A		A	B	A	B
Latency
ID
Position	R	L	R	R	L	L	R	L	L	R	R	L	R	R	L	L	R	L	L	R	R	L	R	R	L	L	R	L	L	R
TRIAL#	1	2	3	4	5	6	7	8	9	10	11	12	13	14	15	16	17	18	19	20	21	22	23	24	25	26	27	28	29	30
Reward	A	B		B		A		A	B	A	B		B		A		A	B	A	B		B		A		A	B	A	B
Latency
